# Supplementary material
Source: PubMed Central journal article supplement (PMC2659281)
Supplement: en.2008-0779_1.pdf [file en.2008-0779_1.pdf]

## EN-08-0779v2 Supplementary Information

### Supplementary Note 1 Semi-quantitative PCR

Prior to carrying out the amplification procedure, optimal primer concentrations for amplification of *rEap1* and cyclophilin cDNAs (1 and 0.6  $\mu$ M, respectively) were determined, in addition to the linear range of the PCR reactions. Cyclophilin mRNA is constitutively expressed and thus serves as an internal standard. The sense *rEap1* primer used (5'-AGCCCCAACTCATCCTCAG-3') corresponds to nt 607-625 in *rEap1* mRNA (GenBank NM\_001012470); the antisense primer (5'-ACGCTCCTGGTCTGTGCTC-3') is complementary to nt 969-987. The sense cyclophilin primer (5'-ACGCCGCTGTCTCTTTTC-3') corresponds to nt 9-26 in rat cyclophilin mRNA (GenBank M19533) and the antisense primer (5'-CTTGCCACCAGTGCCATTAT-3') is complementary to nt 251-270. The PCR program employed consisted of an initial activation step of 15 min at 95 C, and 34 cycles of denaturing at 94 C for 30 sec, annealing at 60 C for 30 sec and 1 min extensions at 72 C, followed by a final extension of 10 min at 72 C. The primers were designed using Primer Select software (DNASTAR Lasergene software v5.08, DNASTAR Inc., Madison, WI).

### Supplementary Note 2 Real-time PCR

This procedure was carried out after diluting 1:50 the reverse transcription reaction (500 ng total RNA in 20  $\mu$ l) and using 2  $\mu$ l of this dilution for PCR amplification. *rEap1* primers and the fluorescent probe used were designed to target a segment comprised within a cloned *rEap1* cDNA described in the **Material and Methods** section of the manuscript. The primers were selected with the assistance of the Primer Express program (Perkin Elmer Applied Biosystems, Foster City, CA). The primer sequences for *rEap1* were: 5' forward (5'-ACTGTATCCTCTGCTCCGTCATC-3') corresponding to nt 883-905 in *rEap1* mRNA (GenBank NM\_001012470) and 3' reverse (5'-ACCGATCCAGGCCTTACC-3'), complementary to nt 946-965. The internal fluorescent oligodeoxynucleotide probe (Applied Biosystems) had a sequence (5'-CCCACCTCTGCCACTGTCGACGAG-3') complementary to nt 909-932 in *rEap1*. Real-time PCR reactions were performed in a total volume of 10  $\mu$ l, each reaction containing 2  $\mu$ l of the diluted reverse transcribed sample or 2  $\mu$ l of the reverse transcribed sense RNA standard, 5  $\mu$ l TaqMan Universal PCR Master Mix (Applied Biosystems), 250 nM of each gene-specific and ribosomal fluorescent probes, 300 nM of each gene specific primer, and 10 nM of each ribosomal primer. The real-time PCR program used consisted of an initial annealing period of 2 min at 50 C, followed by 10 min of denaturing at 95 C, and 40 cycles of 15 sec at 95 C and 1 min at 60 C.

### Supplementary Note 3 Construction of a *rEap1*-luciferase reporter plasmid

To PCR amplify a DNA fragment containing the 5' flanking region of the *rEap1* gene we used PCR primers (sense: 5'-ATACTCGAGAGCCGGCTGTAATAGTGGTCATA-3'; antisense: 5'-ATACTCGAGCCCGGTGCCAGGTCCAATCTT-3') that were modified to contain a XhoI restriction site at each end of the PCR product. The DNA fragment was PCR-amplified from rat tail DNA (isolated by the Proteinase K method) with the Failsafe PCR PreMix Selection kit (Epicentre, Madison, WI) in a 100  $\mu$ l reaction containing 50  $\mu$ l of buffer D, 4  $\mu$ l of each primer (50  $\mu$ M), 0.5  $\mu$ g DNA and 4  $\mu$ l of enzyme. The PCR program consisted of a first denaturing step of 2 min at 95 C, followed by 35 cycles of 30 sec at 95 C, 1 min at 57 C and 3.5 min at 72 C, followed by a final extension of 10 min at 72 C. The PCR product obtained was first cloned into pGEM-T (Promega), digested with Xho I, blunted and ligated into pGL-3-Basic (Promega). The sequence of the subcloned DNA fragment was verified by sequencing.

#### **Supplementary Note 4 Transfection Assays**

Native C6 cells (C6) were grown in Dulbecco's modified Eagle medium (DMEM, Sigma Chemicals, St. Louis, MO) supplemented with 10% fetal bovine serum (FBS, Hyclone, Logan, UT), 100 µg/ml penicillin, and 100 µg/ml streptomycin. C6 $\alpha$  and C6 $\beta$  cells were grown in the same medium supplemented with Hygromycin (200 µg/ml, Invitrogen, Carlsbad, CA). For promoter assays, cells were seeded in 12 well plates (at a 120,000 cells/well), and grown in DMEM without phenol red or antibiotics, containing 10% charcoal-stripped FBS (Hyclone) and glutamine (20 mM). Twenty-four hours after seeding, Lipofectamine 2000 (Invitrogen) was premixed for 30 min with the various reporter gene constructs at a ratio of 1 µg DNA to 2 µl transfection reagent before the mixture was added to the cells. Transfection efficiency was normalized by co-transfecting cells with 250 ng/well of CMV-Sport- $\beta$ -gal (Invitrogen). The total amount of DNA transfected was kept constant at 1 µg by adding the appropriate amount of pCDNA3.1 to each well. The transfection medium was replaced after 5 h by fresh DMEM-10% FBS without phenol red. The cells were harvested 48 h after transfection and assayed for luciferase and  $\beta$ -galactosidase, as reported {3018, 5761}. Basal activity of the *rEap1*-pGL3 construct was first tested in native C6 cells, transfecting the cells with increasing amount of the *Eap1* construct (100, 250, 500 and 1000 ng/ml).

#### **Supplementary Note 5 Immunohistofluorescence**

The EAP1 immunoreaction was developed by incubating the sections with Alexa 594-labeled donkey antirabbit IgG (1:250; Invitrogen). The ER $\alpha$  reaction was developed with biotinylated horse antimouse gamma globulin (1:250, Vector Laboratories, Burlingame, CA) for 1 h at room temperature, followed by incubation with Streptavidin- Alexa 488 (1:500; Invitrogen). Fluorescent images were acquired as reported {5761} using a Marianas<sup>TM</sup> digital imaging workstation (Intelligent Imaging Innovations, Denver, CO) with a 40x C-apochromat NA1.2 objective. The Marianas workstation is equipped with a Zeiss Axiovert 200M microscope (Zeiss, Thornwood, NY) and a motorized stage (API, Eugene, OR).
